# Supplementary material for: Peste des Petits Ruminants Virus, Mauritania
Source: PubMed Central journal article supplement (PMC3901501; doi:10.3201/eid2002.131345), 2014-02
Supplement: 13-1345-Techapp-s1.pdf [file 13-1345-Techapp-s1.pdf]

# Peste des Petits Ruminants Virus, Mauritania

## Technical Appendix

Technical Appendix Table. Serologic prevalence rate fitted with a beta-binomial regression model and 95% confidence interval for peste des petits ruminants in Mauritania, 2010 (n = 1,904 sheep and goats)

| Latitude   | Fitted prevalence rate | Lower limit | Upper limit |
|------------|------------------------|-------------|-------------|
| 15.1; 16.2 | 0.65                   | 0.59        | 0.71        |
| 16.2; 17.3 | 0.34                   | 0.28        | 0.39        |
| 17.3; 18.4 | 0.21                   | 0.14        | 0.29        |

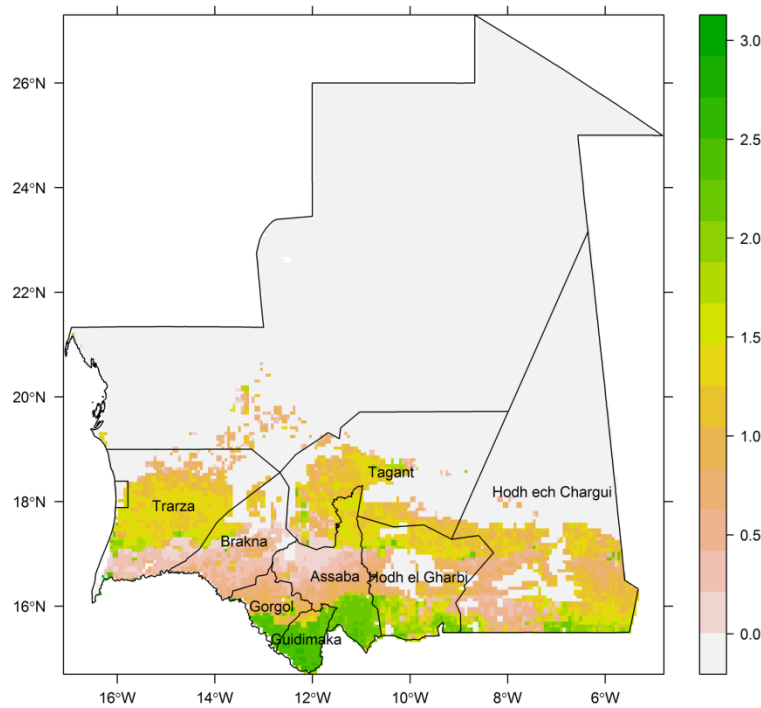

Technical Appendix Figure 1. Small ruminant density in Mauritania: number of sheep and goats by square kilometer ( $\log_{10}$  scale). Densities were adjusted to match 2005 national totals (1).

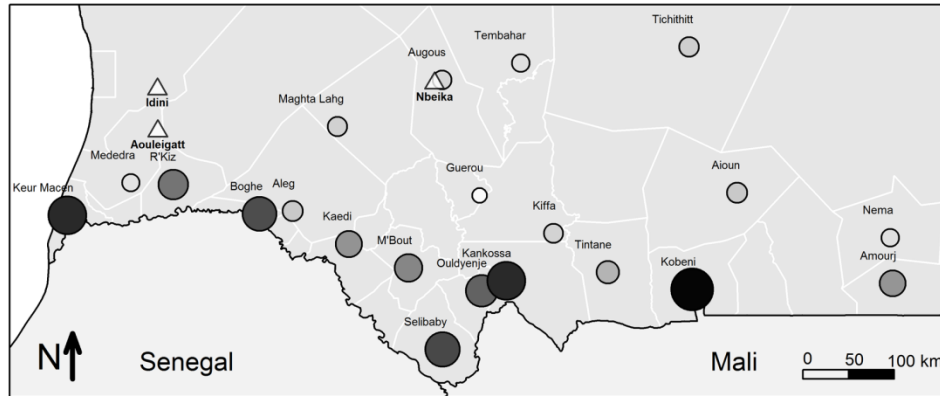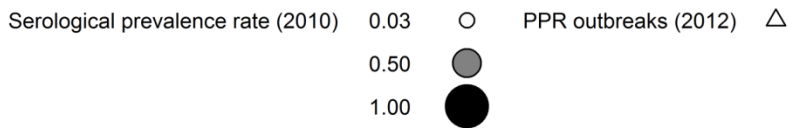

Technical Appendix Figure 2. Observed peste des petits ruminants (PPR) virus seroprevalence rates in Mauritania, 2010 (n = 1,904 sheep and goats), and reported peste des petits ruminants outbreaks in early 2012. Circle size is proportional to PPR seroprevalence rate.

**Reference**

1. Food and Agriculture Organization of the United Nations. Observed livestock densities. Rome: The Organization; 2007 [cited 2013 Oct 15].  
[http://www.fao.org/ag/againfo/resources/en/glw/GLW\\_dens.html](http://www.fao.org/ag/againfo/resources/en/glw/GLW_dens.html)
